# Supplementary material for: Epidemiology of Enterotoxigenic Escherichia coli among Children and Adults Seeking Care at Hospitals in Two Geographically Distinct Rural Areas in Bangladesh
Source: MDPI journal article supplement (doi:10.3390/microorganisms12020359), 2024-02-09
Supplement: s1 [file s1]

## Supplemental Data

**Supplement Table S1. Primers for quantitative PCR (qPCR) and conventional PCR**

| qPCR primers             |          |                             |           |
|--------------------------|----------|-----------------------------|-----------|
| Enterotoxin              | Primer   | Primer sequence 5'– 3'      | Reference |
| STh                      | STh-rtF1 | AAGTGGTCCTGAAAGCATGAATAGTAG | 1         |
|                          | STh-rtR1 | ACCCGGTACAAGCAGGATTACA      |           |
| STp                      | STp-rtF1 | GCAAAATCCGTTTAACTAATCTCAA   | 1         |
|                          | STp-rtR1 | AATTGCCAACATTAGCTTTTTCATG   |           |
| LT                       | LT-RTf   | GGCAGGCAAAAGAGAAATGG        | 1         |
|                          | LT-RTTr  | TCCTTCATCCTTTCAATGGCT       |           |
| Conventional PCR Primers |          |                             |           |
| STh                      | SThF     | TTCACCTTTCCCTCAGGATG        | 2         |
|                          | SThR     | CTATTCATGCTTTCAGGACCA       |           |
| STp                      | STpF     | TCTTTCCCCTCTTTTAGTCAG       | 2         |
|                          | STpR     | ACAGGCAGGATTACAACAAAG       |           |
| LT                       | LTF      | ACGGCGTTACTATCCTCTC         | 2         |
|                          | LTR      | TGGTCTCGGTCAGATATGTG        |           |

**Supplemental Table S2. Association of toxins and major CFs in ETEC isolates**

| <b>Toxin gene present</b> | <b>CF type(s) produced</b> | <b>No. (%) of isolates</b> |
|---------------------------|----------------------------|----------------------------|
| <b>Chhatak</b>            |                            |                            |
| ST                        | CS1+CS7                    | 4 (50)                     |
|                           | CS17/19                    | 3 (37.5)                   |
|                           | Other CFs                  | 1 (12.5)                   |
| LT and ST                 | CS1                        | 1 (50)                     |
|                           | CS1+CS7                    | 1 (50)                     |
| LT                        | CS7                        | 2 (40)                     |
|                           | CS1+CS7                    | 3 (60)                     |
| <b>Mathbaria</b>          |                            |                            |
| ST                        | CFA/I+CS21                 | 2 (9.1)                    |
|                           | CS1                        | 2 (9.1)                    |
|                           | CS2+CS3                    | 1 (4.5)                    |
|                           | CS3                        | 1 (4.5)                    |
|                           | CS5+CS6                    | 5 (22.7)                   |
|                           | CS6                        | 5 (22.7)                   |
|                           | CS17/19                    | 2 (9.1)                    |
|                           | Other CFs                  | 4 (18.2)                   |
|                           | CS2+CS3                    | 1 (20)                     |
|                           | CS5+CS6                    | 1 (20)                     |
|                           | CS17/19                    | 1 (20)                     |
|                           | Other CFs                  | 2 (40)                     |
| LT                        | CFA/I+CS21                 | 1 (50)                     |

**Supplemental Table S3. Association of age groups and major CFs in ETEC isolates**

| Age groups       | CF type(s) produced | No. (%) of isolates |
|------------------|---------------------|---------------------|
| <b>Chhatak</b>   |                     |                     |
| <5               | CS7                 | 2 (33.3)            |
|                  | CS1+CS7             | 3 (50)              |
|                  | CS17/19             | 1 (16.7)            |
| 5-20             | CS1                 | 1 (33.3)            |
|                  | CS17/19             | 2 (66.7)            |
| 20-60            | CS1+CS7             | 5 (83.3)            |
|                  | Other CFs           | 1 (16.7)            |
| <b>Mathbaria</b> |                     |                     |
| <5               | CFA/I+CS21          | 2 (14.3)            |
|                  | CS1                 | 2 (14.3)            |
|                  | CS2+CS3             | 1 (7.1)             |
|                  | CS5+CS6             | 1 (7.1)             |
|                  | CS6                 | 2 (14.3)            |
|                  | CS7                 | 1 (7.1)             |
|                  | CS17/19             | 1 (7.1)             |
|                  | Other CFs           | 4 (28.6)            |
| 5-20             | CS6                 | 1 (100)             |
| 20-60            | CFA/I+CS21          | 1 (10)              |
|                  | CS2+CS3             | 1 (10)              |
|                  | CS5+CS6             | 2 (20)              |
|                  | CS6                 | 2 (20)              |
|                  | CS17/19             | 2 (20)              |
|                  | Other CFs           | 2 (20)              |
| >=60             | CS3                 | 1 (25)              |
|                  | CS5+CS6             | 3 (75)              |

**Supplement Table S4.** Clinical severity of ETEC and Non ETEC diarrhea.

|                    | Non ETEC<br>diarrhea<br>(N=463) | ETEC<br>diarrhea<br>(N=65) | p value |
|--------------------|---------------------------------|----------------------------|---------|
| Dehydration Status |                                 |                            | 0.582   |
| No                 | 78 (16.8%)                      | 11 (16.9%)                 |         |
| Some               | 249<br>(53.8%)                  | 31 (47.7%)                 |         |
| Severe             | 136<br>(29.4%)                  | 23 (35.4%)                 |         |
| Vomiting           |                                 |                            | 0.947   |
| No                 | 116<br>(51.6%)                  | 23 (53.5%)                 |         |
| Yes                | 109<br>(48.4%)                  | 20 (46.5%)                 |         |
| Fever              |                                 |                            | 0.671   |
| No                 | 215<br>(95.6%)                  | 42 (97.7%)                 |         |
| Yes                | 6 (2.7%)                        | 1 (2.3%)                   |         |
| Abdominal<br>cramp |                                 |                            | 0.751   |
| No                 | 61 (48.0%)                      | 11 (42.3%)                 |         |
| Yes                | 66 (52.0%)                      | 15 (57.7%)                 |         |
| IV fluid           |                                 |                            | 0.197   |
| No                 | 414<br>(89.4%)                  | 62 (95.4%)                 |         |
| Yes                | 49 (10.6%)                      | 3 (4.6%)                   |         |
| ORT                |                                 |                            | 0.505   |
| No                 | 69 (30.7%)                      | 16 (37.2%)                 |         |
| Yes                | 156<br>(69.3%)                  | 27 (62.8%)                 |         |
| Hospitalization    |                                 |                            | 0.413   |
| No                 | 75 (33.3%)                      | 11 (25.6%)                 |         |
| Yes                | 150<br>(66.7%)                  | 32 (74.4%)                 |         |

Data for all the variables from all the patients were not available

**Supplement Table S5. Association of dehydration and major CFs in ETEC isolates**

| <b>Dehydration</b> | <b>CF type(s) produced</b> | <b>No. (%) of isolates</b> |
|--------------------|----------------------------|----------------------------|
| <b>Chhatak</b>     |                            |                            |
| No                 | CS7                        | 1 (25)                     |
|                    | CS1+CS7                    | 2 (50)                     |
|                    | CS17/19                    | 1 (25)                     |
| Mild               | CS1                        | 1 (11.1)                   |
|                    | CS7                        | 1 (11.1)                   |
|                    | CS1+ CS7                   | 5 (55.6)                   |
|                    | CS17/19                    | 1 (11.1)                   |
|                    | Other CFs                  | 1 (11.1)                   |
| Severe             | CS1+CS7                    | 1 (50)                     |
|                    | CS17/19                    | 1 (50)                     |
| <b>Mathbaria</b>   |                            |                            |
| No                 | CS17/19                    | 1 (25)                     |
|                    | Other CFs                  | 3 (75)                     |
| Mild               | CS1                        | 2 (18.2)                   |
|                    | CS5+CS6                    | 2 (18.2)                   |
|                    | CS6                        | 4 (36.4)                   |
|                    | CS17/19                    | 2 (18.2)                   |
|                    | Other CFs                  | 1 (9.1)                    |
| Severe             | CFA/I+CS21                 | 3 (21.4)                   |
|                    | CS2+CS3                    | 2 (14.3)                   |
|                    | CS3                        | 1 (7.1)                    |
|                    | CS5+CS6                    | 4 (28.6)                   |
|                    | CS6                        | 1 (7.1)                    |
|                    | CS7                        | 1 (7.1)                    |
|                    | Other CFs                  | 2 (14.3)                   |

**Drinking water sources of the patients with ETEC diarrhea:**

Among the ETEC positive patients, in Chhatak, 100% (25/25) used improved drinking (tube well), 56% (14 /25) improved bathing and washing water sources. In Mathbaria, 30% (12/40) used improved drinking water sources and only 7.5% used improved bathing and water sources. Pond water was used by 30% (10/40) of the ETEC diarrhea patients. There were no significant differences in the water sources in the ETEC and non-ETEC diarrhea patients.

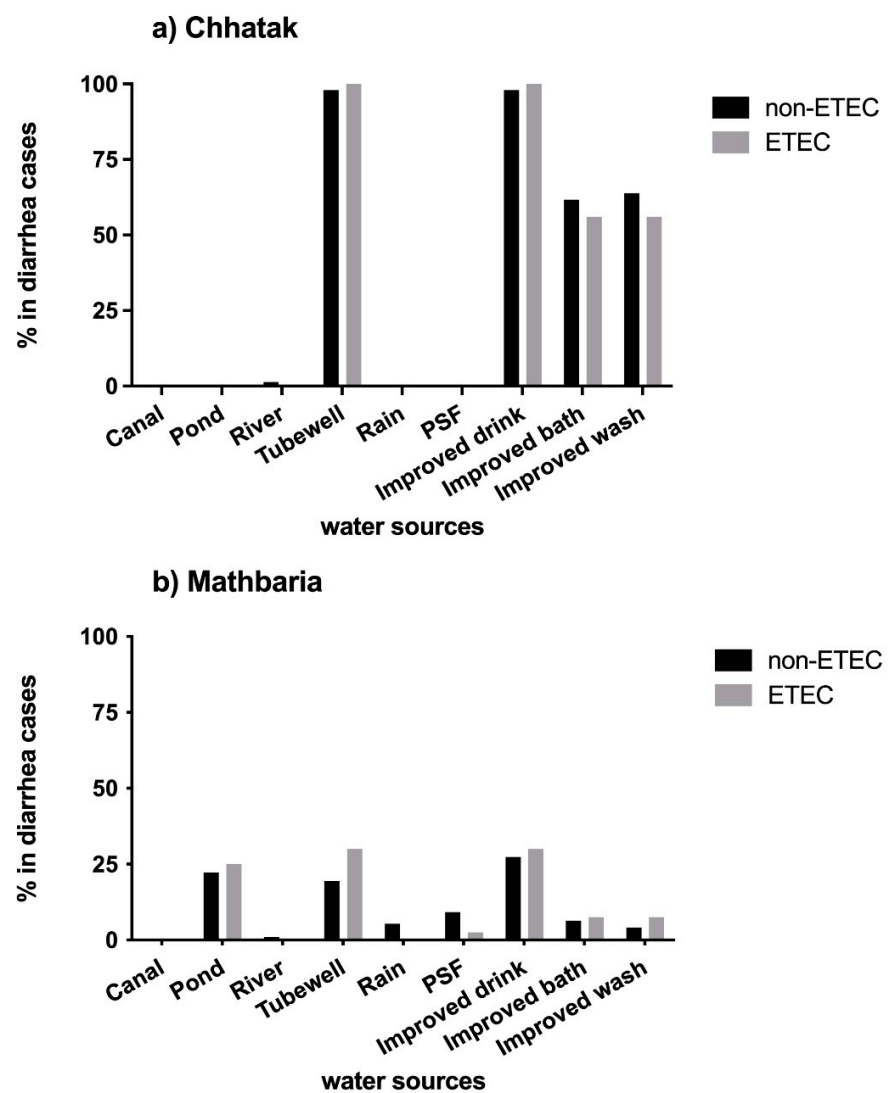

**Supplemental Figure S1.** Water sources for drinking, bathing, and washing among the ETEC patients. (a) Chhatak. (b) Mathbaria. Black bar: number of

non-ETEC diarrhea cases using each water source divided by the total number of non-ETEC diarrhea cases at the site. Grey bar: number of ETEC diarrhea cases using each water source divided by the total number of ETEC diarrhea cases at the site.

## References

1. Lothigius, Å.; Janzon A.; Begum, Y.; Sjöling, Å.; Qadri, F.; Svennerholm, A.-M., Bölin, I. Enterotoxigenic *Escherichia coli* is detectable in water samples from an endemic area by real-time PCR, *Journal of Applied Microbiology*, **2008**, 104(4): 1128–1136
2. Rodas, C.; Iniguez, V.; Qadri, F.; Wiklund, G.; Svennerholm, A.M'; Sjöling, A. Development of multiplex PCR assays for detection of enterotoxigenic *Escherichia coli* colonization factors and toxins. *J Clin Microbiol* **2009**, 47(4):1218-20
